# Supplementary material for: Fluctuating exciton localization in giant π-conjugated spoked-wheel macrocycles
Source: Springer Nature journal article supplement (doi:10.1038/nchem.1758), 2013-09-27
Supplement: 41557_2013_BFnchem1758_MOESM19_ESM.mol [file 41557_2013_BFnchem1758_MOESM19_ESM.mol]

  ChemDraw09101310332D

186199  0  0  0  0  0  0  0  0999 V2000
   -5.6355   -0.6692    0.0000 C   0  0  0  0  0  0  0  0  0  0  0  0
   -6.0440   -1.3860    0.0000 C   0  0  0  0  0  0  0  0  0  0  0  0
   -6.8690   -1.3907    0.0000 C   0  0  0  0  0  0  0  0  0  0  0  0
   -7.2855   -0.6786    0.0000 C   0  0  0  0  0  0  0  0  0  0  0  0
   -6.8771    0.0382    0.0000 C   0  0  0  0  0  0  0  0  0  0  0  0
   -6.0521    0.0429    0.0000 C   0  0  0  0  0  0  0  0  0  0  0  0
   -8.0935   -0.5117    0.0000 C   0  0  0  0  0  0  0  0  0  0  0  0
   -8.1844    0.3083    0.0000 C   0  0  0  0  0  0  0  0  0  0  0  0
   -7.4326    0.6481    0.0000 N   0  0  0  0  0  0  0  0  0  0  0  0
   -8.7581   -1.0004    0.0000 C   0  0  0  0  0  0  0  0  0  0  0  0
   -9.5137   -0.6691    0.0000 C   0  0  0  0  0  0  0  0  0  0  0  0
   -9.6046    0.1508    0.0000 C   0  0  0  0  0  0  0  0  0  0  0  0
   -8.9399    0.6395    0.0000 C   0  0  0  0  0  0  0  0  0  0  0  0
   -4.8106   -0.6645    0.0000 C   0  0  0  0  0  0  0  0  0  0  0  0
  -10.3602    0.4821    0.0000 C   0  0  0  0  0  0  0  0  0  0  0  0
  -11.1157    0.8134    0.0000 C   0  0  0  0  0  0  0  0  0  0  0  0
   -3.9856   -0.6598    0.0000 C   0  0  0  0  0  0  0  0  0  0  0  0
  -11.8713    1.1446    0.0000 C   0  0  0  0  0  0  0  0  0  0  0  0
   -3.1606   -0.6551    0.0000 C   0  0  0  0  0  0  0  0  0  0  0  0
  -12.5360    0.6559    0.0000 C   0  0  0  0  0  0  0  0  0  0  0  0
  -13.2916    0.9871    0.0000 C   0  0  0  0  0  0  0  0  0  0  0  0
  -13.3825    1.8071    0.0000 C   0  0  0  0  0  0  0  0  0  0  0  0
  -12.7178    2.2958    0.0000 C   0  0  0  0  0  0  0  0  0  0  0  0
  -11.9622    1.9646    0.0000 C   0  0  0  0  0  0  0  0  0  0  0  0
   -2.7522    0.0617    0.0000 C   0  0  0  0  0  0  0  0  0  0  0  0
   -1.9272    0.0664    0.0000 C   0  0  0  0  0  0  0  0  0  0  0  0
   -1.5106   -0.6457    0.0000 C   0  0  0  0  0  0  0  0  0  0  0  0
   -1.9190   -1.3625    0.0000 C   0  0  0  0  0  0  0  0  0  0  0  0
   -2.7440   -1.3672    0.0000 C   0  0  0  0  0  0  0  0  0  0  0  0
   -0.6856   -0.6410    0.0000 C   0  0  0  0  0  0  0  0  0  0  0  0
  -14.1380    2.1384    0.0000 C   0  0  0  0  0  0  0  0  0  0  0  0
   -7.2657    1.4561    0.0000 C   0  0  0  0  0  0  0  0  0  0  0  0
   -7.8819    2.0046    0.0000 C   0  0  0  0  0  0  0  0  0  0  0  0
   -7.7150    2.8125    0.0000 C   0  0  0  0  0  0  0  0  0  0  0  0
   -6.9318    3.0719    0.0000 C   0  0  0  0  0  0  0  0  0  0  0  0
   -6.3156    2.5234    0.0000 C   0  0  0  0  0  0  0  0  0  0  0  0
   -6.4825    1.7155    0.0000 C   0  0  0  0  0  0  0  0  0  0  0  0
   -6.7649    3.8799    0.0000 C   0  0  0  0  0  0  0  0  0  0  0  0
   -7.3811    4.4284    0.0000 C   0  0  0  0  0  0  0  0  0  0  0  0
   -7.2142    5.2363    0.0000 C   0  0  0  0  0  0  0  0  0  0  0  0
   -6.4310    5.4957    0.0000 C   0  0  0  0  0  0  0  0  0  0  0  0
   -5.8148    4.9472    0.0000 C   0  0  0  0  0  0  0  0  0  0  0  0
   -5.9817    4.1393    0.0000 C   0  0  0  0  0  0  0  0  0  0  0  0
  -14.8936    2.4696    0.0000 C   0  0  0  0  0  0  0  0  0  0  0  0
    0.1394   -0.6363    0.0000 C   0  0  0  0  0  0  0  0  0  0  0  0
  -15.6492    2.8009    0.0000 C   0  0  0  0  0  0  0  0  0  0  0  0
  -16.4048    3.1322    0.0000 C   0  0  0  0  0  0  0  0  0  0  0  0
  -17.1603    3.4634    0.0000 Si  0  0  0  0  0  0  0  0  0  0  0  0
  -17.4916    2.7078    0.0000 C   0  0  0  0  0  0  0  0  0  0  0  0
  -17.9159    3.7947    0.0000 C   0  0  0  0  0  0  0  0  0  0  0  0
  -16.8291    4.2190    0.0000 C   0  0  0  0  0  0  0  0  0  0  0  0
  -17.0029    2.0432    0.0000 C   0  0  0  0  0  0  0  0  0  0  0  0
  -18.3116    2.6169    0.0000 C   0  0  0  0  0  0  0  0  0  0  0  0
  -18.0068    4.6147    0.0000 C   0  0  0  0  0  0  0  0  0  0  0  0
  -18.5806    3.3060    0.0000 C   0  0  0  0  0  0  0  0  0  0  0  0
  -17.3178    4.8837    0.0000 C   0  0  0  0  0  0  0  0  0  0  0  0
  -16.0091    4.3099    0.0000 C   0  0  0  0  0  0  0  0  0  0  0  0
   16.7127    2.9853    0.0000 C   0  0  0  0  0  0  0  0  0  0  0  0
   17.4645    3.3251    0.0000 C   0  0  0  0  0  0  0  0  0  0  0  0
   18.2162    3.6650    0.0000 Si  0  0  0  0  0  0  0  0  0  0  0  0
   17.8764    4.4167    0.0000 C   0  0  0  0  0  0  0  0  0  0  0  0
   18.9680    4.0048    0.0000 C   0  0  0  0  0  0  0  0  0  0  0  0
   18.5561    2.9132    0.0000 C   0  0  0  0  0  0  0  0  0  0  0  0
   18.3575    5.0869    0.0000 C   0  0  0  0  0  0  0  0  0  0  0  0
   17.0554    4.4983    0.0000 C   0  0  0  0  0  0  0  0  0  0  0  0
   19.0495    4.8258    0.0000 C   0  0  0  0  0  0  0  0  0  0  0  0
   19.6382    3.5237    0.0000 C   0  0  0  0  0  0  0  0  0  0  0  0
   18.0750    2.2430    0.0000 C   0  0  0  0  0  0  0  0  0  0  0  0
   19.3770    2.8316    0.0000 C   0  0  0  0  0  0  0  0  0  0  0  0
   10.6987    0.2665    0.0000 C   0  0  0  0  0  0  0  0  0  0  0  0
   10.6172   -0.5545    0.0000 C   0  0  0  0  0  0  0  0  0  0  0  0
    9.8654   -0.8943    0.0000 C   0  0  0  0  0  0  0  0  0  0  0  0
    9.1952   -0.4132    0.0000 C   0  0  0  0  0  0  0  0  0  0  0  0
    9.2768    0.4078    0.0000 C   0  0  0  0  0  0  0  0  0  0  0  0
   10.0285    0.7476    0.0000 C   0  0  0  0  0  0  0  0  0  0  0  0
    8.3892   -0.5893    0.0000 C   0  0  0  0  0  0  0  0  0  0  0  0
    7.9727    0.1228    0.0000 C   0  0  0  0  0  0  0  0  0  0  0  0
    8.5212    0.7390    0.0000 N   0  0  0  0  0  0  0  0  0  0  0  0
    7.9808   -1.3061    0.0000 C   0  0  0  0  0  0  0  0  0  0  0  0
    7.1558   -1.3108    0.0000 C   0  0  0  0  0  0  0  0  0  0  0  0
    6.7393   -0.5987    0.0000 C   0  0  0  0  0  0  0  0  0  0  0  0
    7.1477    0.1181    0.0000 C   0  0  0  0  0  0  0  0  0  0  0  0
   11.4505    0.6063    0.0000 C   0  0  0  0  0  0  0  0  0  0  0  0
    5.9143   -0.6034    0.0000 C   0  0  0  0  0  0  0  0  0  0  0  0
    5.0893   -0.6081    0.0000 C   0  0  0  0  0  0  0  0  0  0  0  0
   12.2022    0.9462    0.0000 C   0  0  0  0  0  0  0  0  0  0  0  0
    4.2643   -0.6128    0.0000 C   0  0  0  0  0  0  0  0  0  0  0  0
   12.9540    1.2860    0.0000 C   0  0  0  0  0  0  0  0  0  0  0  0
    3.8559   -1.3296    0.0000 C   0  0  0  0  0  0  0  0  0  0  0  0
    3.0309   -1.3343    0.0000 C   0  0  0  0  0  0  0  0  0  0  0  0
    2.6143   -0.6222    0.0000 C   0  0  0  0  0  0  0  0  0  0  0  0
    3.0227    0.0946    0.0000 C   0  0  0  0  0  0  0  0  0  0  0  0
    3.8477    0.0993    0.0000 C   0  0  0  0  0  0  0  0  0  0  0  0
   13.0355    2.1070    0.0000 C   0  0  0  0  0  0  0  0  0  0  0  0
   13.7873    2.4468    0.0000 C   0  0  0  0  0  0  0  0  0  0  0  0
   14.4575    1.9657    0.0000 C   0  0  0  0  0  0  0  0  0  0  0  0
   14.3759    1.1448    0.0000 C   0  0  0  0  0  0  0  0  0  0  0  0
   13.6242    0.8049    0.0000 C   0  0  0  0  0  0  0  0  0  0  0  0
   15.2092    2.3056    0.0000 C   0  0  0  0  0  0  0  0  0  0  0  0
    1.7893   -0.6269    0.0000 C   0  0  0  0  0  0  0  0  0  0  0  0
    8.3451    1.5450    0.0000 C   0  0  0  0  0  0  0  0  0  0  0  0
    7.5590    1.7955    0.0000 C   0  0  0  0  0  0  0  0  0  0  0  0
    7.3829    2.6014    0.0000 C   0  0  0  0  0  0  0  0  0  0  0  0
    7.9928    3.1570    0.0000 C   0  0  0  0  0  0  0  0  0  0  0  0
    8.7789    2.9065    0.0000 C   0  0  0  0  0  0  0  0  0  0  0  0
    8.9550    2.1005    0.0000 C   0  0  0  0  0  0  0  0  0  0  0  0
    7.8167    3.9629    0.0000 C   0  0  0  0  0  0  0  0  0  0  0  0
    7.0307    4.2134    0.0000 C   0  0  0  0  0  0  0  0  0  0  0  0
    6.8545    5.0194    0.0000 C   0  0  0  0  0  0  0  0  0  0  0  0
    7.4645    5.5749    0.0000 C   0  0  0  0  0  0  0  0  0  0  0  0
    8.2505    5.3244    0.0000 C   0  0  0  0  0  0  0  0  0  0  0  0
    8.4267    4.5185    0.0000 C   0  0  0  0  0  0  0  0  0  0  0  0
    0.9644   -0.6316    0.0000 C   0  0  0  0  0  0  0  0  0  0  0  0
   15.9610    2.6454    0.0000 C   0  0  0  0  0  0  0  0  0  0  0  0
    4.2562    0.8161    0.0000 O   0  0  0  0  0  0  0  0  0  0  0  0
    6.1394    6.2127    0.0000 C   0  0  0  0  0  0  0  0  0  0  0  0
    6.2935    5.4022    0.0000 C   0  0  0  0  0  0  0  0  0  0  0  0
    5.6686    4.8635    0.0000 C   0  0  0  0  0  0  0  0  0  0  0  0
    5.8227    4.0531    0.0000 C   0  0  0  0  0  0  0  0  0  0  0  0
    5.1978    3.5144    0.0000 C   0  0  0  0  0  0  0  0  0  0  0  0
    5.3519    2.7039    0.0000 C   0  0  0  0  0  0  0  0  0  0  0  0
    4.7270    2.1653    0.0000 C   0  0  0  0  0  0  0  0  0  0  0  0
    4.8810    1.3548    0.0000 C   0  0  0  0  0  0  0  0  0  0  0  0
   -3.1687    0.7738    0.0000 O   0  0  0  0  0  0  0  0  0  0  0  0
   -3.2013    6.4895    0.0000 C   0  0  0  0  0  0  0  0  0  0  0  0
   -2.7847    5.7774    0.0000 C   0  0  0  0  0  0  0  0  0  0  0  0
   -3.1931    5.0606    0.0000 C   0  0  0  0  0  0  0  0  0  0  0  0
   -2.7766    4.3485    0.0000 C   0  0  0  0  0  0  0  0  0  0  0  0
   -3.1850    3.6316    0.0000 C   0  0  0  0  0  0  0  0  0  0  0  0
   -2.7684    2.9195    0.0000 C   0  0  0  0  0  0  0  0  0  0  0  0
   -3.1769    2.2027    0.0000 C   0  0  0  0  0  0  0  0  0  0  0  0
   -2.7603    1.4906    0.0000 C   0  0  0  0  0  0  0  0  0  0  0  0
  -11.2976    2.4533    0.0000 O   0  0  0  0  0  0  0  0  0  0  0  0
   -7.6198    6.8332    0.0000 C   0  0  0  0  0  0  0  0  0  0  0  0
   -7.7679    6.0135    0.0000 C   0  0  0  0  0  0  0  0  0  0  0  0
   -8.5369    5.7373    0.0000 C   0  0  0  0  0  0  0  0  0  0  0  0
   -8.6850    4.9179    0.0000 C   0  0  0  0  0  0  0  0  0  0  0  0
   -9.4545    4.6415    0.0000 C   0  0  0  0  0  0  0  0  0  0  0  0
   -9.6024    3.8231    0.0000 C   0  0  0  0  0  0  0  0  0  0  0  0
  -10.3740    3.5460    0.0000 C   0  0  0  0  0  0  0  0  0  0  0  0
  -10.5211    2.7322    0.0000 C   0  0  0  0  0  0  0  0  0  0  0  0
  -13.9562    0.4984    0.0000 O   0  0  0  0  0  0  0  0  0  0  0  0
  -19.6382   -0.1541    0.0000 C   0  0  0  0  0  0  0  0  0  0  0  0
  -18.9670    0.3394    0.0000 C   0  0  0  0  0  0  0  0  0  0  0  0
  -18.2187    0.0113    0.0000 C   0  0  0  0  0  0  0  0  0  0  0  0
  -17.5478    0.5047    0.0000 C   0  0  0  0  0  0  0  0  0  0  0  0
  -16.7990    0.1764    0.0000 C   0  0  0  0  0  0  0  0  0  0  0  0
  -16.1290    0.6690    0.0000 C   0  0  0  0  0  0  0  0  0  0  0  0
  -15.3781    0.3398    0.0000 C   0  0  0  0  0  0  0  0  0  0  0  0
  -14.7118    0.8297    0.0000 C   0  0  0  0  0  0  0  0  0  0  0  0
   -1.5025   -2.0746    0.0000 O   0  0  0  0  0  0  0  0  0  0  0  0
   -1.4699   -7.7903    0.0000 C   0  0  0  0  0  0  0  0  0  0  0  0
   -1.8865   -7.0782    0.0000 C   0  0  0  0  0  0  0  0  0  0  0  0
   -1.4780   -6.3614    0.0000 C   0  0  0  0  0  0  0  0  0  0  0  0
   -1.8946   -5.6493    0.0000 C   0  0  0  0  0  0  0  0  0  0  0  0
   -1.4862   -4.9325    0.0000 C   0  0  0  0  0  0  0  0  0  0  0  0
   -1.9027   -4.2204    0.0000 C   0  0  0  0  0  0  0  0  0  0  0  0
   -1.4943   -3.5035    0.0000 C   0  0  0  0  0  0  0  0  0  0  0  0
   -1.9109   -2.7914    0.0000 C   0  0  0  0  0  0  0  0  0  0  0  0
    2.6225   -2.0511    0.0000 O   0  0  0  0  0  0  0  0  0  0  0  0
   -0.6924   -6.7075    0.0000 C   0  0  0  0  0  0  0  0  0  0  0  0
   -0.6141   -5.8862    0.0000 C   0  0  0  0  0  0  0  0  0  0  0  0
    0.1363   -5.5434    0.0000 C   0  0  0  0  0  0  0  0  0  0  0  0
    0.2146   -4.7221    0.0000 C   0  0  0  0  0  0  0  0  0  0  0  0
    0.9650   -4.3793    0.0000 C   0  0  0  0  0  0  0  0  0  0  0  0
    1.0433   -3.5580    0.0000 C   0  0  0  0  0  0  0  0  0  0  0  0
    1.7937   -3.2152    0.0000 C   0  0  0  0  0  0  0  0  0  0  0  0
    1.8721   -2.3939    0.0000 C   0  0  0  0  0  0  0  0  0  0  0  0
   12.3653    2.5881    0.0000 O   0  0  0  0  0  0  0  0  0  0  0  0
    9.9889    7.7903    0.0000 C   0  0  0  0  0  0  0  0  0  0  0  0
   10.6657    7.3045    0.0000 C   0  0  0  0  0  0  0  0  0  0  0  0
   10.5849    6.4915    0.0000 C   0  0  0  0  0  0  0  0  0  0  0  0
   11.2614    6.0058    0.0000 C   0  0  0  0  0  0  0  0  0  0  0  0
   11.1805    5.1922    0.0000 C   0  0  0  0  0  0  0  0  0  0  0  0
   11.8561    4.7073    0.0000 C   0  0  0  0  0  0  0  0  0  0  0  0
   11.7750    3.8914    0.0000 C   0  0  0  0  0  0  0  0  0  0  0  0
   12.4469    3.4091    0.0000 C   0  0  0  0  0  0  0  0  0  0  0  0
   15.0461    0.6637    0.0000 O   0  0  0  0  0  0  0  0  0  0  0  0
   17.4225   -4.5385    0.0000 C   0  0  0  0  0  0  0  0  0  0  0  0
   16.7458   -4.0528    0.0000 C   0  0  0  0  0  0  0  0  0  0  0  0
   16.8266   -3.2397    0.0000 C   0  0  0  0  0  0  0  0  0  0  0  0
   16.1501   -2.7541    0.0000 C   0  0  0  0  0  0  0  0  0  0  0  0
   16.2309   -1.9405    0.0000 C   0  0  0  0  0  0  0  0  0  0  0  0
   15.5553   -1.4555    0.0000 C   0  0  0  0  0  0  0  0  0  0  0  0
   15.6364   -0.6396    0.0000 C   0  0  0  0  0  0  0  0  0  0  0  0
   14.9645   -0.1573    0.0000 C   0  0  0  0  0  0  0  0  0  0  0  0
  1  2  2  0      
  2  3  1  0      
  3  4  2  0      
  4  5  1  0      
  5  6  2  0      
  6  1  1  0      
  4  7  1  0      
  7  8  2  0      
  8  9  1  0      
  9  5  1  0      
  7 10  1  0      
 10 11  2  0      
 11 12  1  0      
 12 13  2  0      
 13  8  1  0      
  1 14  1  0      
 12 15  1  0      
 15 16  3  0      
 14 17  3  0      
 16 18  1  0      
 17 19  1  0      
 18 20  2  0      
 20 21  1  0      
 21 22  2  0      
 22 23  1  0      
 23 24  2  0      
 24 18  1  0      
 19 25  2  0      
 25 26  1  0      
 26 27  2  0      
 27 28  1  0      
 28 29  2  0      
 29 19  1  0      
 27 30  1  0      
 22 31  1  0      
 21142  1  0      
 24133  1  0      
 28151  1  0      
 25124  1  0      
  9 32  1  0      
 32 33  2  0      
 33 34  1  0      
 34 35  2  0      
 35 36  1  0      
 36 37  2  0      
 37 32  1  0      
 35 38  1  0      
 38 39  2  0      
 39 40  1  0      
 40 41  2  0      
 41 42  1  0      
 42 43  2  0      
 43 38  1  0      
 31 44  3  0      
 30 45  3  0      
 44 46  1  0      
 46 47  3  0      
 47 48  1  0      
 48 49  1  0      
 48 50  1  0      
 48 51  1  0      
 49 52  1  0      
 49 53  1  0      
 50 54  1  0      
 50 55  1  0      
 51 56  1  0      
 51 57  1  0      
 58 59  3  0      
 59 60  1  0      
 60 61  1  0      
 60 62  1  0      
 60 63  1  0      
 61 64  1  0      
 61 65  1  0      
 62 66  1  0      
 62 67  1  0      
 63 68  1  0      
 63 69  1  0      
 70 71  2  0      
 71 72  1  0      
 72 73  2  0      
 73 74  1  0      
 74 75  2  0      
 75 70  1  0      
 73 76  1  0      
 76 77  2  0      
 77 78  1  0      
 78 74  1  0      
 76 79  1  0      
 79 80  2  0      
 80 81  1  0      
 81 82  2  0      
 82 77  1  0      
 70 83  1  0      
 81 84  1  0      
 84 85  3  0      
 83 86  3  0      
 85 87  1  0      
 86 88  1  0      
 87 89  2  0      
 89 90  1  0      
 90 91  2  0      
 91 92  1  0      
 92 93  2  0      
 93 87  1  0      
 88 94  2  0      
 94 95  1  0      
 95 96  2  0      
 96 97  1  0      
 97 98  2  0      
 98 88  1  0      
 96 99  1  0      
 91100  1  0      
 90160  1  0      
 93115  1  0      
 97178  1  0      
 94169  1  0      
 78101  1  0      
101102  2  0      
102103  1  0      
103104  2  0      
104105  1  0      
105106  2  0      
106101  1  0      
104107  1  0      
107108  2  0      
108109  1  0      
109110  2  0      
110111  1  0      
111112  2  0      
112107  1  0      
100113  3  0      
 99114  3  0      
 45113  1  0      
 58114  1  0      
115123  1  0      
116117  1  0      
117118  1  0      
118119  1  0      
119120  1  0      
120121  1  0      
121122  1  0      
122123  1  0      
124132  1  0      
125126  1  0      
126127  1  0      
127128  1  0      
128129  1  0      
129130  1  0      
130131  1  0      
131132  1  0      
133141  1  0      
134135  1  0      
135136  1  0      
136137  1  0      
137138  1  0      
138139  1  0      
139140  1  0      
140141  1  0      
142150  1  0      
143144  1  0      
144145  1  0      
145146  1  0      
146147  1  0      
147148  1  0      
148149  1  0      
149150  1  0      
151159  1  0      
152153  1  0      
153154  1  0      
154155  1  0      
155156  1  0      
156157  1  0      
157158  1  0      
158159  1  0      
160168  1  0      
161162  1  0      
162163  1  0      
163164  1  0      
164165  1  0      
165166  1  0      
166167  1  0      
167168  1  0      
169177  1  0      
170171  1  0      
171172  1  0      
172173  1  0      
173174  1  0      
174175  1  0      
175176  1  0      
176177  1  0      
178186  1  0      
179180  1  0      
180181  1  0      
181182  1  0      
182183  1  0      
183184  1  0      
184185  1  0      
185186  1  0      
M  END
